# Supplementary material for: Cumulative Risk, Age at Onset, and Sex-Specific Differences for Developing End-Stage Renal Disease in Young Patients With Type 1 Diabetes: A Nationwide Population-Based Cohort Study
Source: PubMed Central journal article supplement — Diabetes. 2010 Apr 27;59(7):1803–8. doi: 10.2337/db09-1744 (PMC2889782; doi:10.2337/db09-1744), 2010-04-27
Supplement: supp_db09-1744_onlineappendix.pdf [file supp_db09-1744_onlineappendix.pdf]

## ONLINE APPENDIX

**Members of the Swedish Childhood Diabetes Study (SCDS).** Gisela Dahlquist (Umeå), Agneta Brännström and Yonas Berhan (Luleå), Agne Lindh (Borås), Karin Segnestam (Eskilstuna), Kalle Snellman (Falun), Åke Stenberg and Christer Nilsson (Gällivare), Gunilla Kördel-Engberg (Gävle), Bengt Lindblad (Göteborg), Nils Östen Nilsson (Halmstad), Jan Neiderud (Helsingborg), Herje Hörnell and Åke Lagervall (Hudiksvall), Lars Ivar Hardell (Kalmar), Hans Edenwall (Karlskrona), Gudrun Jonsell (Karlstad), Karin Larsson (Kristianstad), Bengt Hansing (Lidköping), Sture Sjöblad (Lund), Lars Stenhammar (Norrköping), Lennart Hellenberg (Nyköping), Anna Trela (Skellefteå), Marie Bourdin (Skövde), Britta Björsell (Sollefteå), Susanne Rudberg and Ingemar Zachrisson (Stockholm), Torunn Torbjörnsdotter (Huddinge), Leif Blom (Stockholm), Eva Landgren (Sundsvall), Ragnar Hanås (Uddevalla), Jan Gustafsson (Uppsala), Margareta Blomgren (Visby), Nils Wramner (Trollhättan), Björn Eriksson (Västervik), Björn Jönsson (Ystad), Carl Göran Arvidsson (Västerås), Stig Edvardsson (Växjö), Ulf Ståhle (Ängelholm), Jan Åman (Örebro), Stellan Sjögren (Örnsköldsvik), Anna-Lena Nilsson (Östersund).

**Members of the Diabetes Incidence Study in Sweden (DISS).** Hans Arnvist (Linköping), Jan Bolinder (Stockholm), Per-Ola Carlsson (Uppsala), Soffia Gudbjörnsdóttir (Göteborg), Mona Landin-Olsson (Malmö-Lund), Olov Rolandsson (Umeå), Lennarth Nyström and Jan Östman.

**Members of the board of the Swedish Renal Registry (SRR).** Bengt Rippe (Lund), KG Prütz (Malmö), Astrid Seeberger (Stockholm), Lars Bäckman (Göteborg)
